# Supplementary material for: FnCpf1: a novel and efficient genome editing tool for Saccharomyces cerevisiae
Source: PubMed Central journal article supplement — Nucleic Acids Res. 2017 Nov 2;45(21):12585–98. doi: 10.1093/nar/gkx1007 (PMC5716609; doi:10.1093/nar/gkx1007), 2017-11-02
Supplement: gkx1007_supp.pdf [file gkx1007_supp.pdf]

***FnCpf1, a novel and efficient genome editing tool for *Saccharomyces cerevisiae****

Michal A. Świat, Sofia Dashko, Maxime den Ridder, Melanie Wijsman, John van der Oost, Jean Marc Daran, Pascale Daran-Lapujade

**Supplementary material**

## Supplementary Figure S1

***Fncpf1* integration scheme and validation diagnostic PCR.** A – Schematic overview of the diagnostic PCR set up used to confirm correct integration of the *Fncpf1* and *KIURA3* expression cassettes into the *SGA1* locus. Primer numbers are shown. #1,2 and 3 represent corresponding PCR fragments of expected length. B – Agarose gel with PCR reactions shown in above section A. Transformants 3, 4 and 5 were positive for all three diagnostic reactions. NC – negative control (genomic DNA of CEN.PK113-7D)

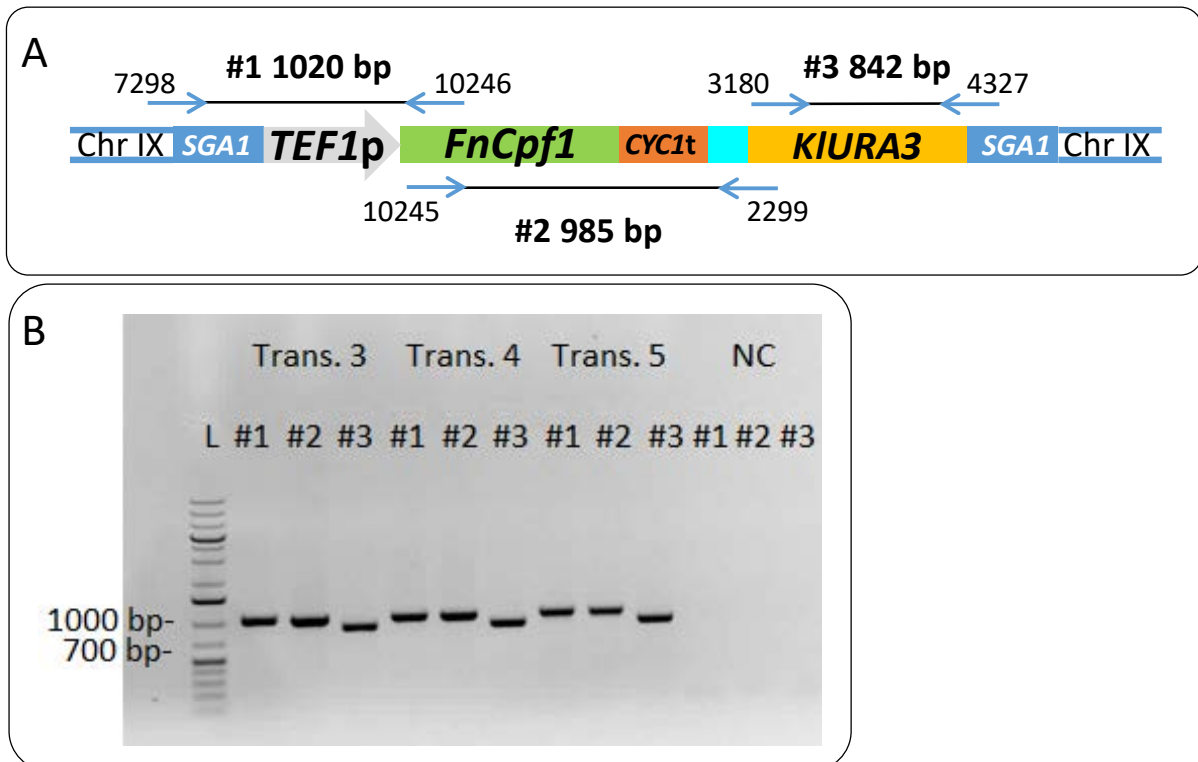

## Supplementary Figure S2

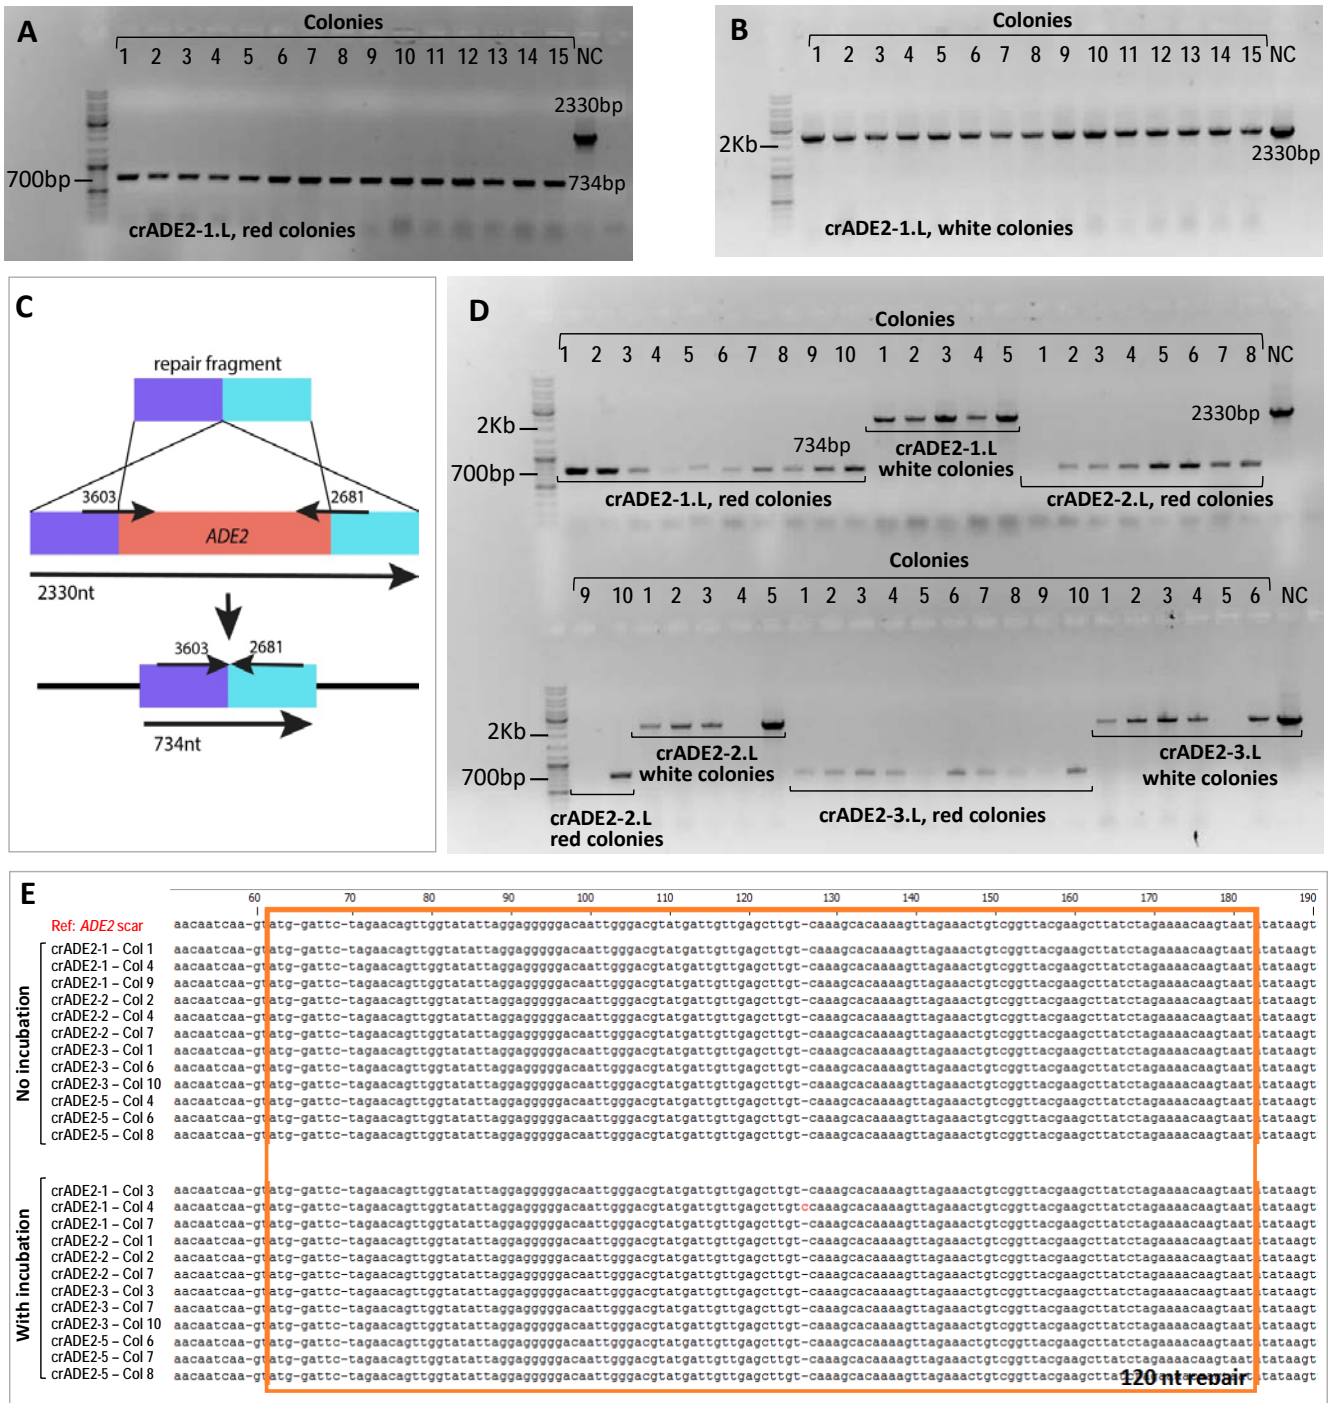

**Fncpf1 mediated editing of *ADE2*:** Diagnostic PCR and sequencing of IMX1139 (*TEF1p::Fncpf1::CYC1t*) transformed with crRNA arrays of different AT content targeting *ADE2*, with long direct repeats (36nt). A and B: Targeting with crADE2-1 (36% AT). NC: negative control, PCR with the control strain CEN.PK113-7D. A: Diagnostic PCR of red colonies, all colonies show a 734-bp band indicating deletion of *ADE2*; B: Diagnostic PCR of white colonies, the band at 2330 bp indicates that *ADE2* is intact, as shown by NC. C: schematic representation of the native and edited *ADE2* locus. Diagnostic PCR primers and fragments size are indicated. D: Diagnostic PCR after prolonged incubation between transformation and plating. Targeting with crADE2-1, crADE2-2 and crADE2-3 (36, 44 and 52% AT

respectively) are shown. Both red and white colonies were checked. NC: negative control, PCR with the control strain CEN.PK113-7D. E: sequence alignment of the *ADE2* locus after transformation with the CRISPR plasmids carrying crADE2-1, crADE2-2 and crADE2-3. Incubation was prolonged by 48 hours between transformation and plating. Only red colonies were checked. Sequencing confirms targeted editing of *ADE2* gene and repair by integration of the repair DNA fragment.

## Supplementary Figure S3

***Fn*Cpf1-mediated multisite editing.** A: composition of the CRISPR arrays for single, double and quadruple genome editing target sites. 36-nt direct repeats were used and CRISPR plasmids were assembled *in vivo*. B: Efficiency of genome editing for single, double or quadruple deletions, following the design described in A. Genome editing efficiency is calculated as the fraction of positive colonies out of 10 colonies randomly picked and analysed by PCR. Values represent the mean and standard deviation of three independent transformations with five technical replicates each. Plating was performed just after transformation, without additional incubation.

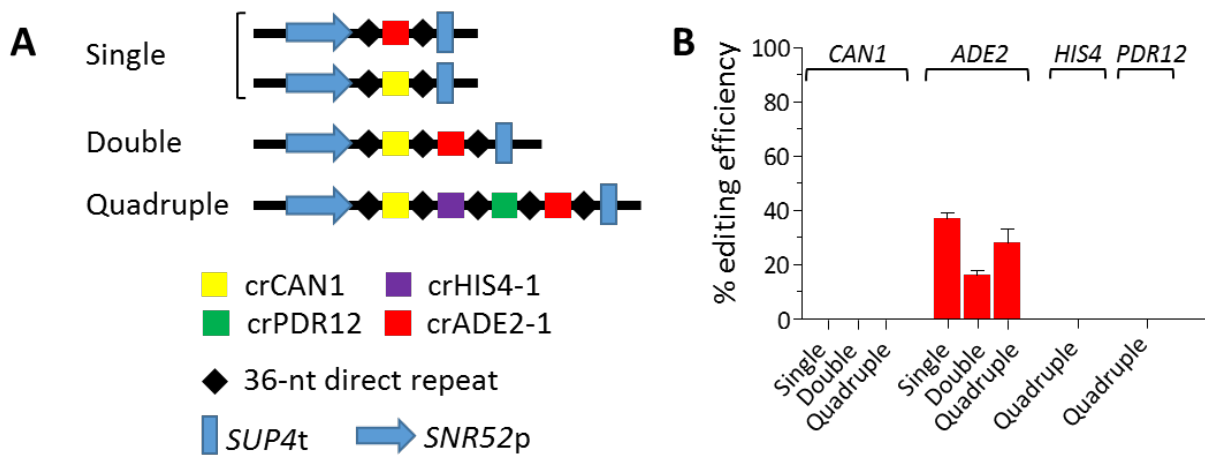

## Supplementary Figure S4

Sanger sequencing of the targeted loci in clones transformed with the quadruple crRNA array targeting *CAN1*, *HIS4*, *PDR12* and *ADE2* loci. A: sequence alignment of *ADE2* gene of red colonies shows targeted *ADE2* editing with correct integration of repair fragment. B: sequence alignment of *ADE2* gene of white colonies shows intact *ADE2* gene with PAM still present, C: sequence alignment of *HIS4* gene of white and red colonies shows intact *HIS4* gene with PAM still present. D: sequence alignment of *PDR12* gene of white and red colonies shows intact *PDR12* gene with PAM still present. E: sequence alignment of *CAN1* gene of white and red colonies shows intact *CAN1* gene with PAM still present

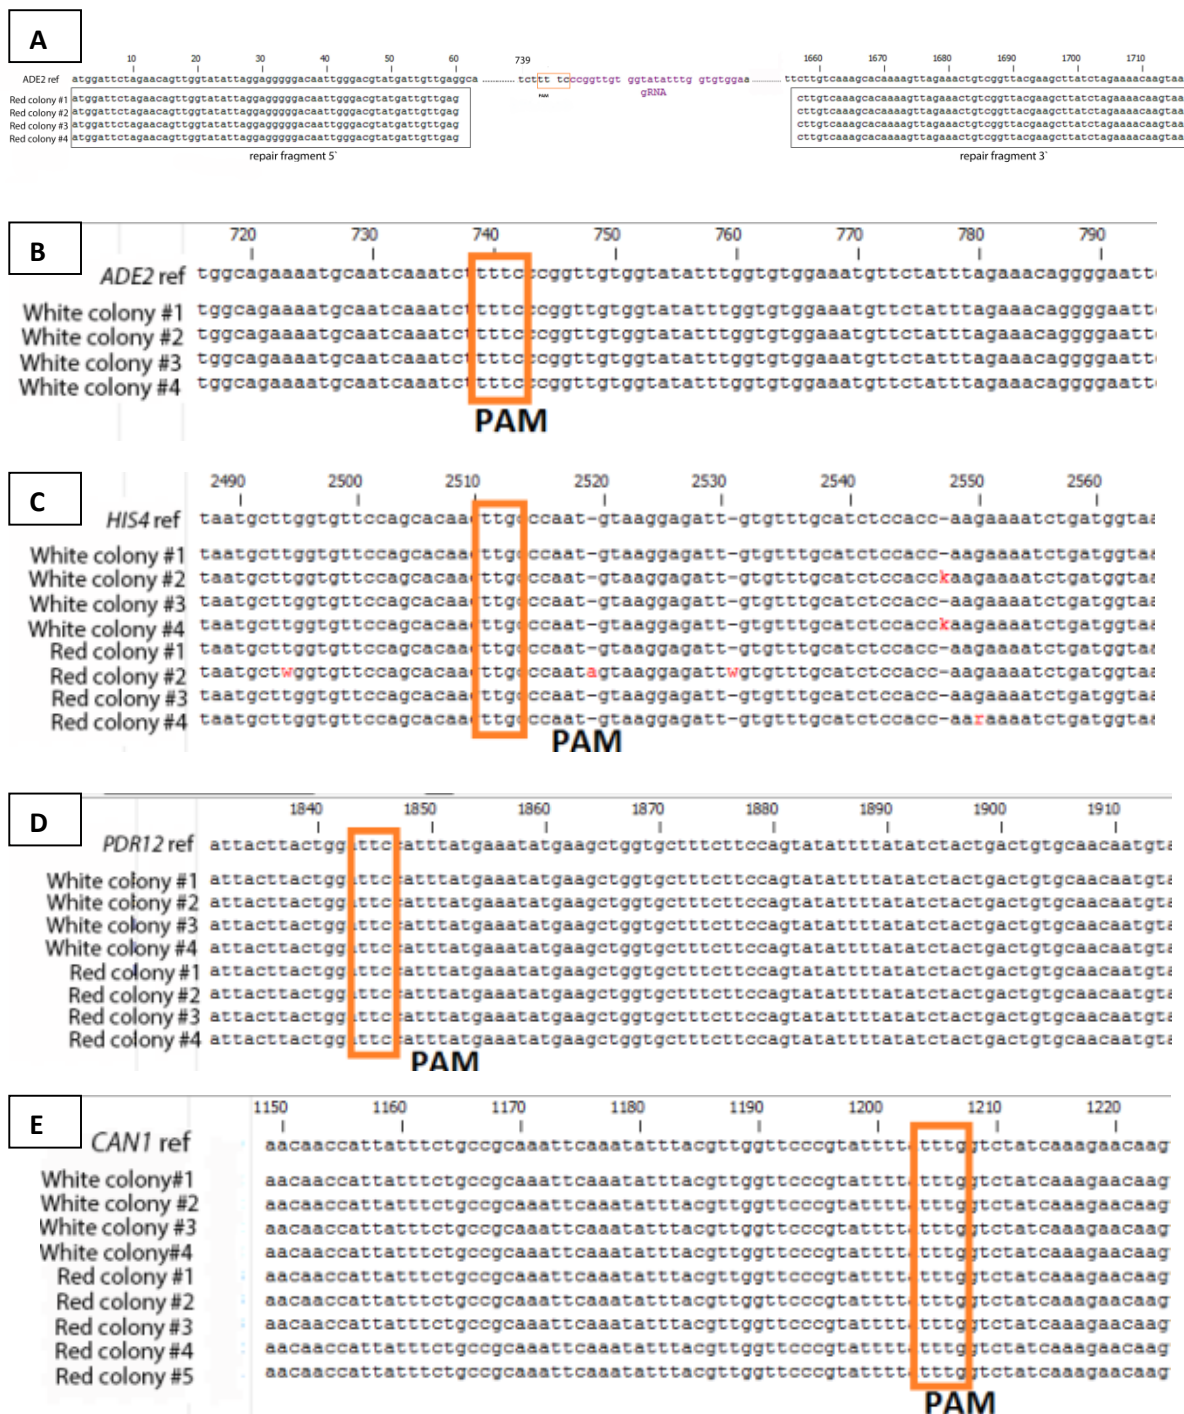

## Supplementary Figure S5

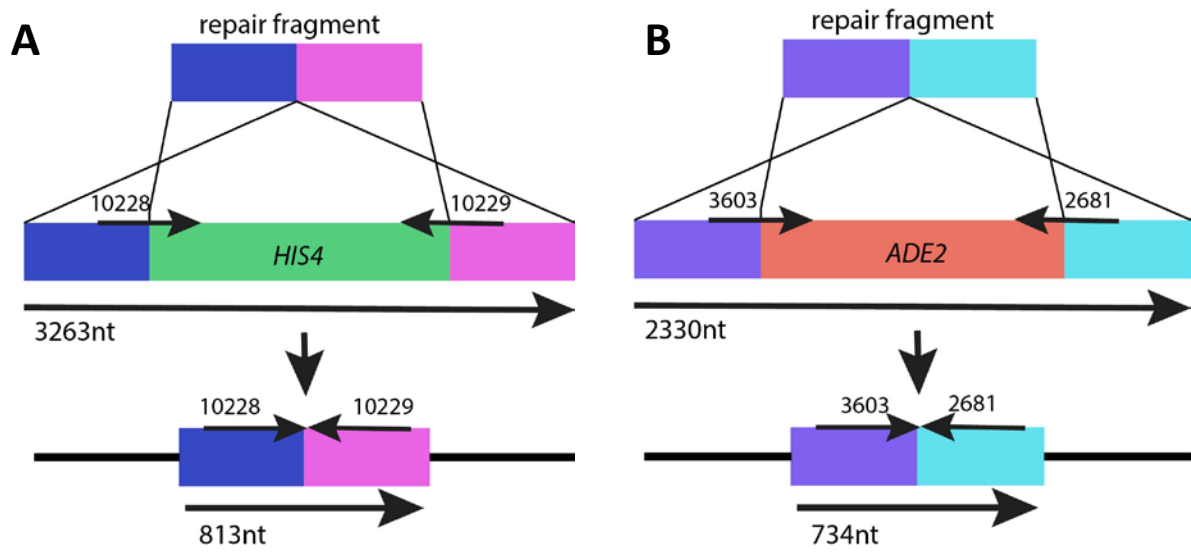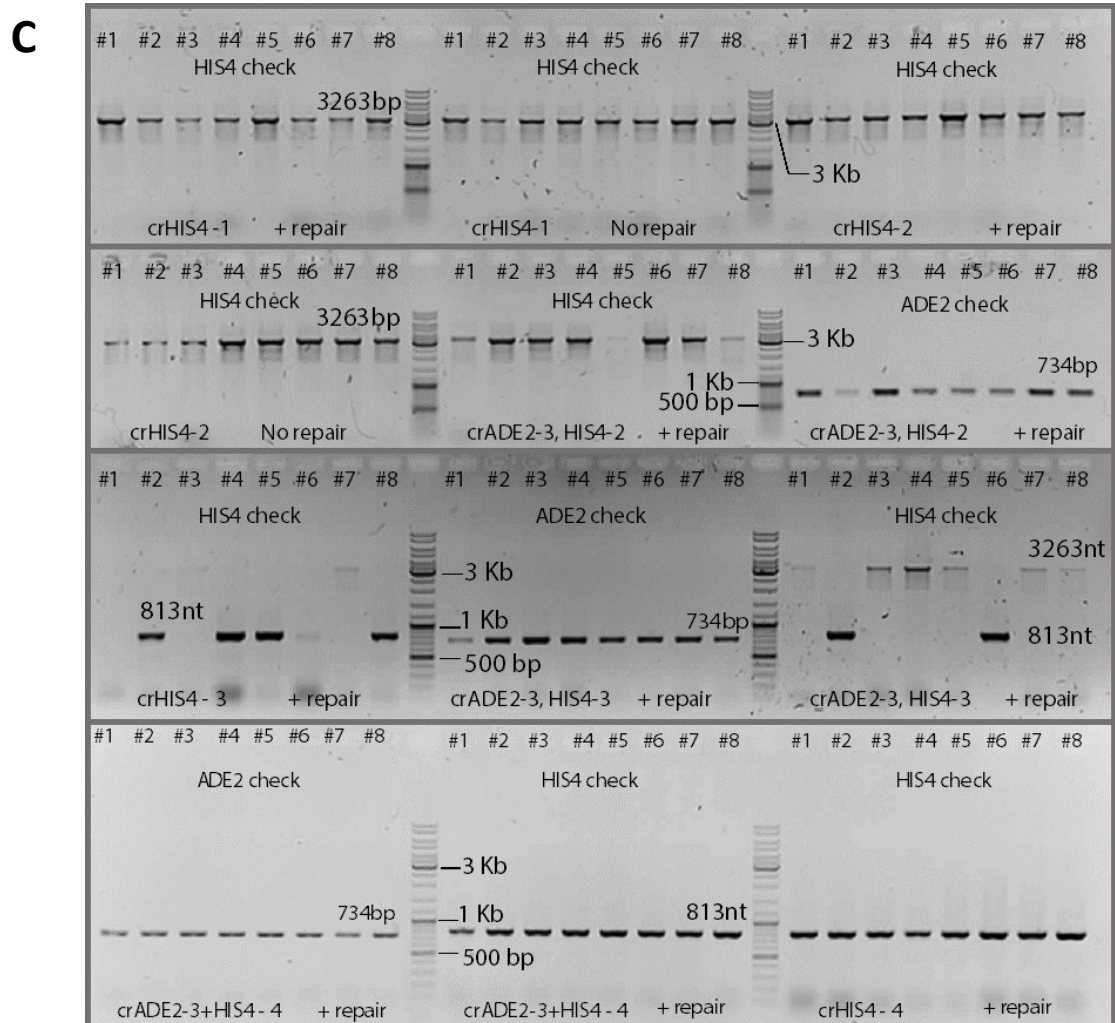

**Diagnostic PCR of IMX1139 transformed with crRNA arrays for *HIS4* single deletion (crHIS4-1, crHIS4-2, crHIS4-3, crHIS4-4) and double deletion (crADE2-3.crHIS4-2, crADE2-3.crHIS4-3, crADE2-3.crHIS4-4), using short DR (19nt).** A,B: Schematic representation of the native and edited *HIS4* (A) and *ADE2* (B) locus. Diagnostic PCR primers and fragments size are indicated. C: diagnostic PCR of *ADE2* and *HIS4* editing after transformation with CRISPR arrays targeting one and two genes and repair DNA. Agarose gels with diagnostic PCR performed on eight colonies picked from each transformation. crRNA array, gene tested and obtained fragment size are indicated on the figure. When no editing was observed (crHIS4-1, crHIS4-2), colonies from plates in which repair DNA was omitted from the transformation mix were also tested (no repair).



Supplementary figure S5

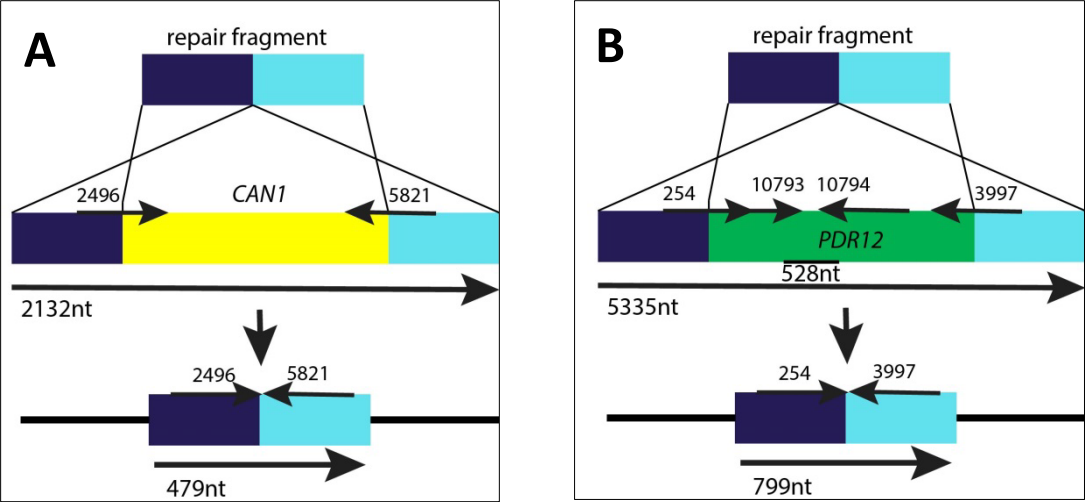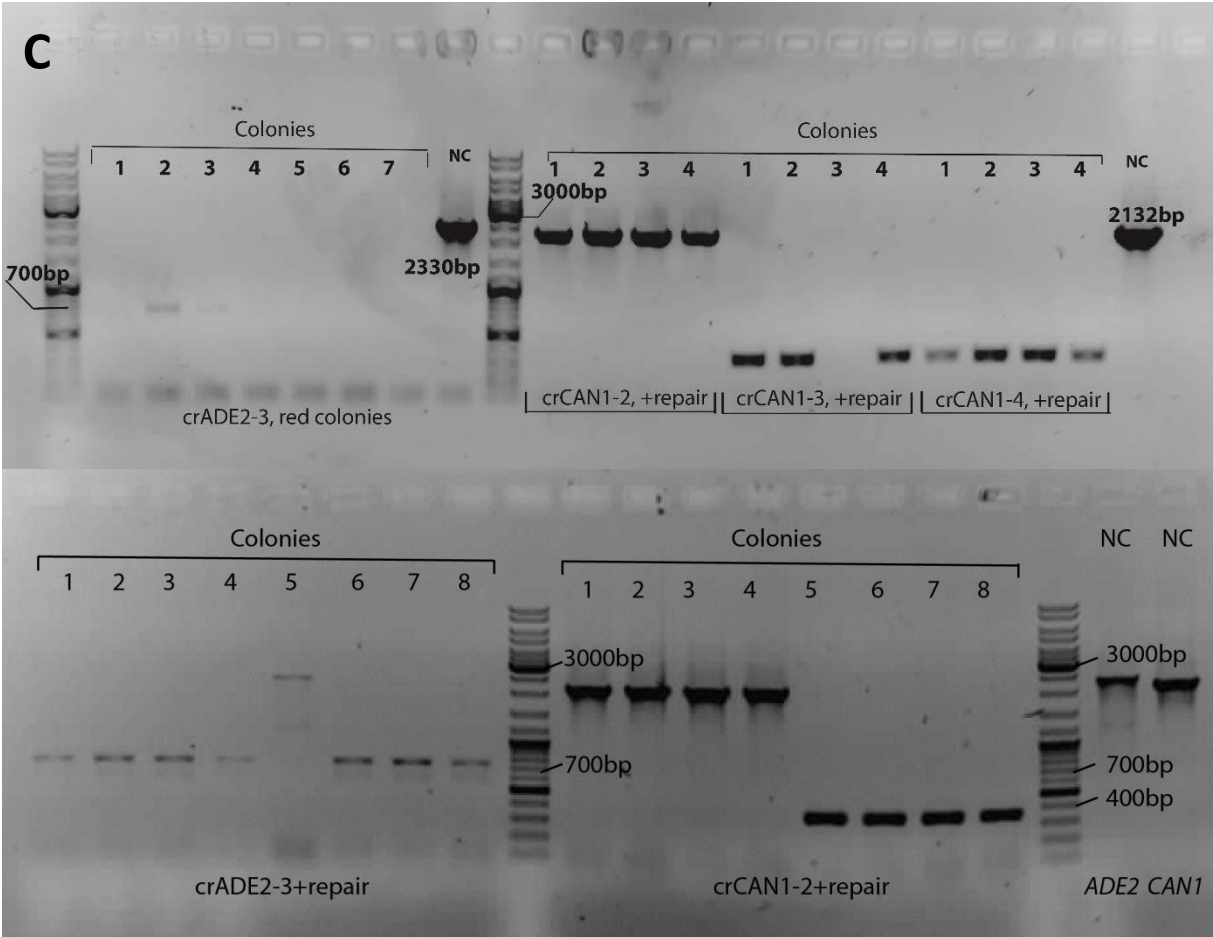

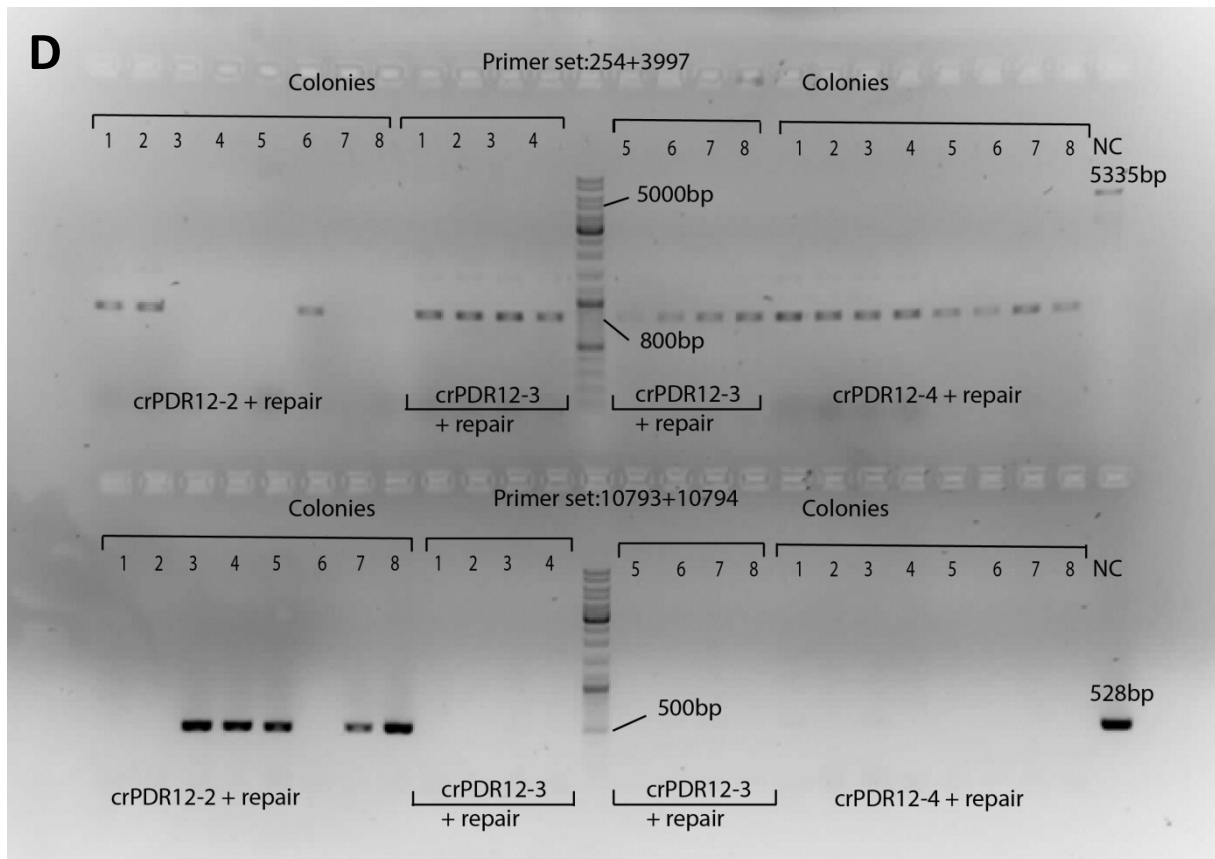

**Diagnostic PCR of IMX1139 transformed with crRNA arrays for *CAN1* (crCAN1-2, crCAN1-3, crCAN1-4) and *PDR12* single deletions (crPDR12-2, crPDR12-3, crPDR12-4), using short DRs (19nt).** A,B: Schematic representation of the native and edited *CAN1* (A) and *PDR12* (B) locus. Diagnostic PCR primers and fragments size are indicated. Two sets of primers are used for *PDR12* editing analysis. C,D: diagnostic PCR of *CAN1* and *PDR12* editing after transformation with CRISPR arrays and repair DNA. Agarose gels with diagnostic PCR performed on eight colonies picked from each transformation. crRNA array, gene tested and obtained fragment size are indicated on the figure.

Supplementary figure S6

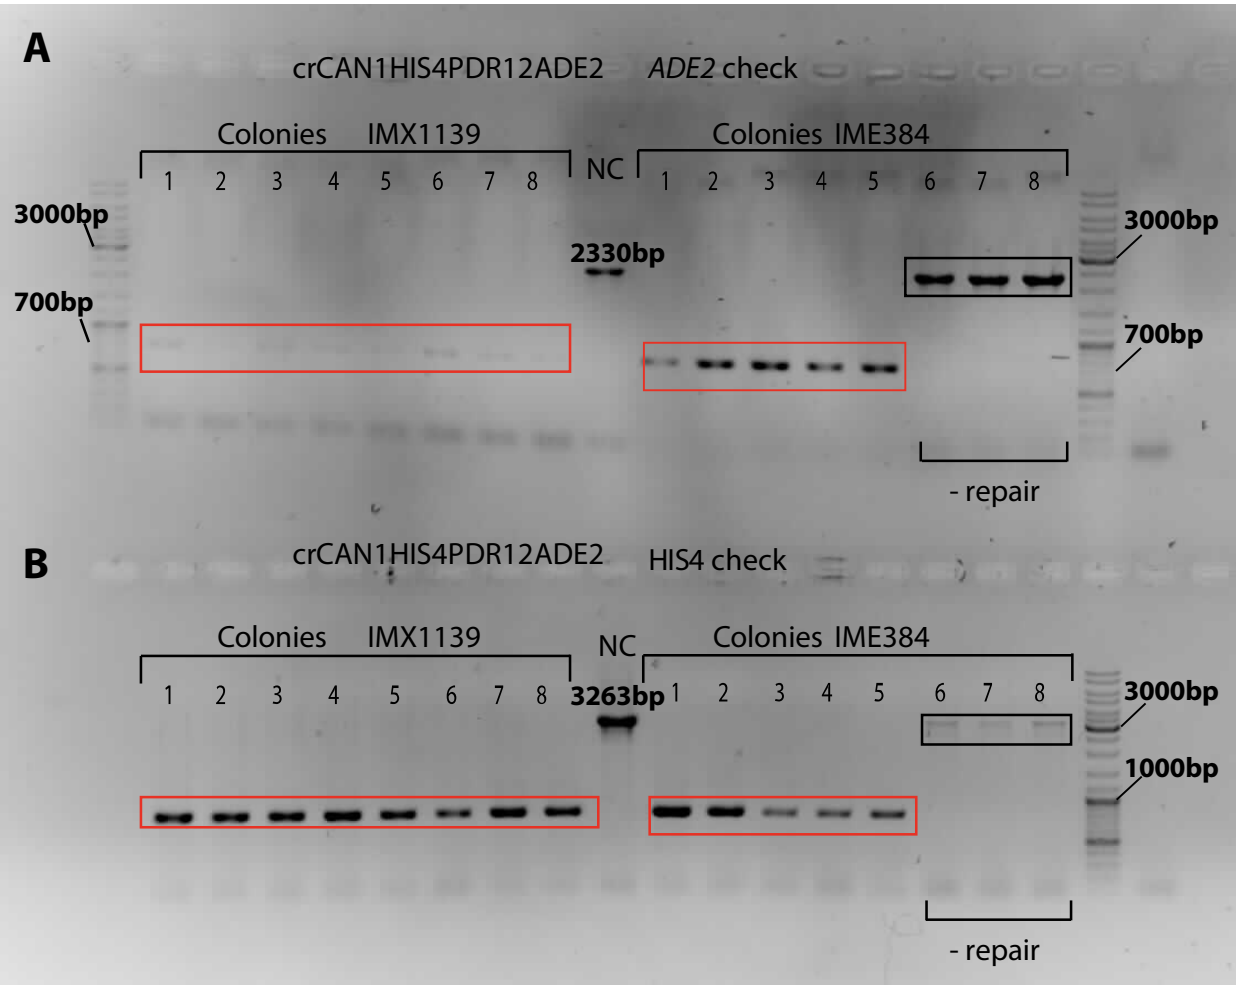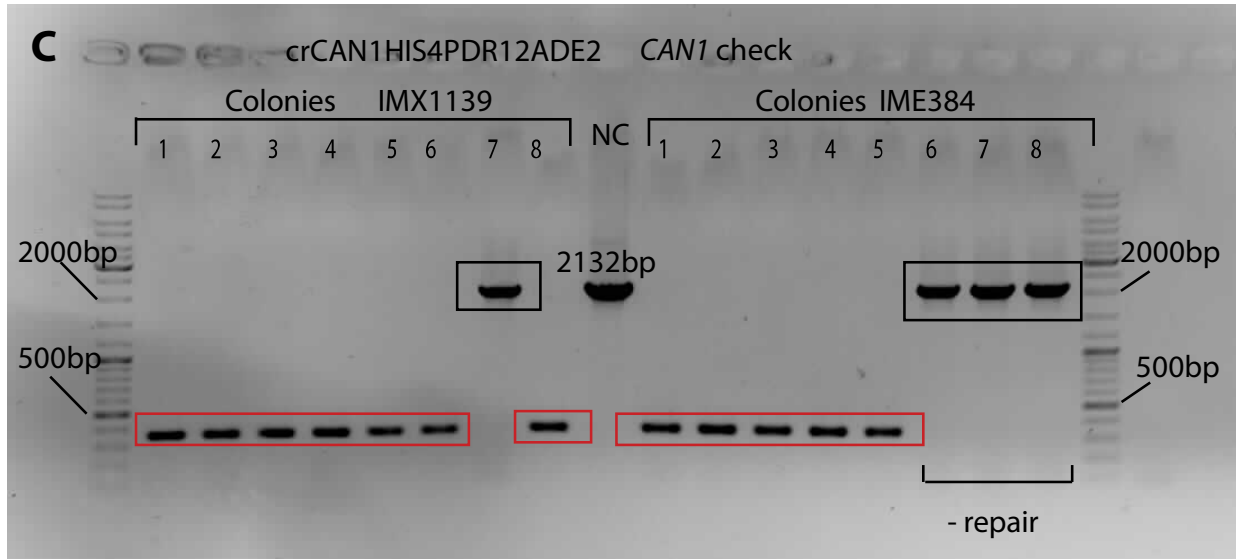

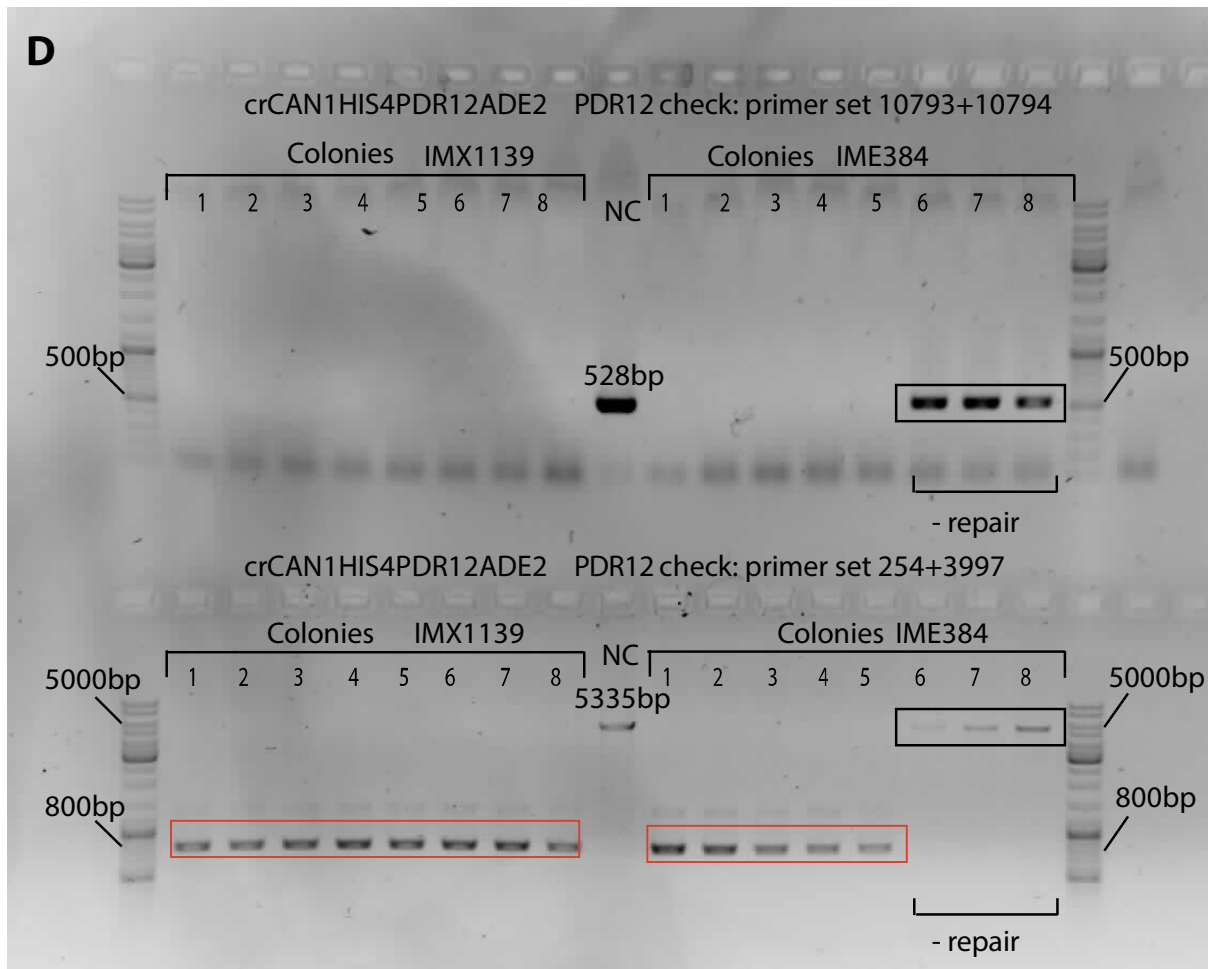

**Diagnostic PCR of IMX1139 (*Fncpf1* in genomic locus) and IME384 (*Fncpf1* on a multicopy plasmid) transformed with crRNA arrays for simultaneous editing of four targets: *CAN1*, *HIS4*, *PDR12* and *ADE2* (order corresponds to crRNA order in the array), using short DR (19nt). Diagnostic PCR of *ADE2* (A) and *HIS4* (B), *CAN1* (C) and *PDR12* (D) editing after transformation with CRISPR arrays and repair DNA. For *PDR12* (D), primer set 10793+10794 binds inside, and primer set 254+3997 outside of the coding sequence. Agarose gels with diagnostic PCR were performed on eight colonies picked from each transformation. In case of IME384 three colonies without addition of repair fragment were analysed as indicated on the figures A, B, C and D (lanes 6 to 8). crRNA array, targeted gene and obtained fragment size are indicated on the figure. Red boxes indicate expected fragment size in the case of DNA editing by *Fncpf1*, while black boxes indicate fragment size in the absence of DNA editing by *Fncpf1*. crRNA plasmid used: pUDE735.**

## Supplementary figure S7

**In vitro assembly of crRNA expression plasmid using preassembled backbone and crRNA array** -This approach can be used to construct in a few steps any crRNA expressing plasmid of interest. To this end, the crRNA of any of the CRISPR plasmids available from Addgene (i.e. pUD628, pUDE710, pUDE714, pUD722, pUD724 and pUDE735, carrying crRNAs targeting *HIS4*, *ADE2*, *PDR2* and *CAN1* for single, double or quadruple deletion) can be replaced by a single or an array of crRNAs targeting the desired DNA loci, as described below (Figure S7a). For plasmid, primer sequences, reagents descriptions, please see Materials and methods section and Suppl. Table 1). Plasmid sequences are available from Addgene.

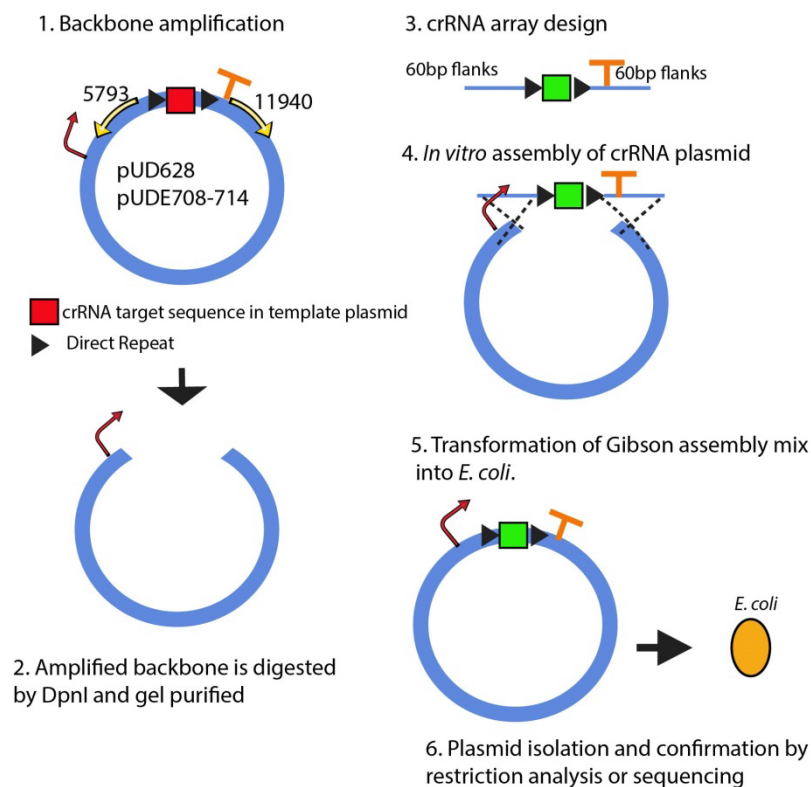

**Figure S7a. Schematic overview of the crRNA expression plasmid construction workflow**

- 1. Amplification of the backbone of crRNA plasmid.** For that, any of the CRISPR plasmids (pUD628, pUDE710, pUDE714, pUD722, pUD724 and pUDE735) can be used as a template. Primers 5793 and 11940 were used with the following PCR setup (Phusion polymerase):

98<sup>0</sup> – 30 s

$$\left[ \begin{array}{l} 98^0 - 10 \text{ s} \\ 65^0 - 30 \text{ s} \\ 68^0 - 1 \text{ min } 30 \text{ s} \end{array} \right] \times 35$$

68<sup>0</sup> – 5 min

4<sup>0</sup> – hold

2. **Purification of the CRISPR plasmid backbone.** The amplicon was subsequently digested using DpnI and followed by a heat inactivation step (5 min at 80°C). This DpnI digestion step allows to remove the circular template remaining after PCR amplification. This step helps to reduce the number of false positive colonies after transformation. The 5058 nt amplicon was separated using a 1% agarose gel, then excised from the gel and purified.

*Note: Gel purification is required as unspecific bands are present after the PCR amplification step.*

3. **crRNA design.** The crRNA should match the following design criteria: (i) 5'-TTTV-3' PAM, located at the 5' end of the crRNA (ii) no thymine in the first position of the crRNA sequence, (iii) AT content between 30 and 70%, iv) 25 nt length. The crRNA should be flanked by direct repeats of 19 nt on each side, resulting in a DR-crRNA-DR construct. The sequence of the DR is 5'-AATTTCTACTGTTGTAGAT-3'. To enable *in vitro* assembly into the plasmid backbone (Figure 7a, steps 1,2) the DR-crRNA-DR construct should be flanked by the following sequences that are homologous to the plasmid backbone:

5' flank: TGAAAGTTGGTGCGCATGTTTCGGCGTTCGAAACTTCCGCAGTGAAAGATAAATGATC

3' flank: TTTTTTGTTTTTATGTCTTATCGTGACGCAGTCCCATGGGCCATTACAAACTCATGCA  
GACAGTCAGGGAATCCTAGC

The crRNA array for a single target should be as follows:

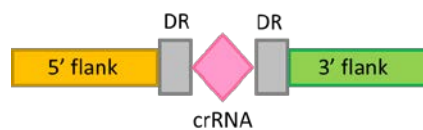

For multiplexing the crRNA array looks as follows:

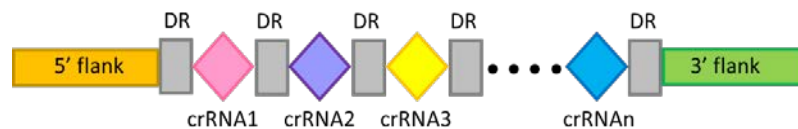

4. **Ordering the crRNA array.** The crRNA array can be ordered as synthetic block ( for example as gBlock from Integrated DNA Technologies, US).

*Note: when ordering from IDT, product amount up to 750 nt will be 500 ng. This is sufficient amount for in vitro assembly and the PCR amplification step can be avoided.*

5. **In vitro assembly of the CRISPR plasmid.** The plasmid backbone and the custom-made array can be assembled using NEBuilder® HiFi DNA Assembly Master Mix (New England Biolabs). We used a total reaction volume of 5µl and a 1:3 backbone to array ratio and followed the manufacturer's instructions.
6. **Transformation of the CRISPR plasmid to E. coli.** 1µl of the assembly mix was transformed into E.coli competent cells (see Materials and methods section ). Colonies were screened using PCR and restriction analysis. Colonies harbouring the correct plasmid were restreaked to single colony isolate, stocked and inoculated for plasmid isolation. 500 ng of CRISPR plasmids can be used for transformation to yeast.

The final plasmid is represented in Figure S7b.

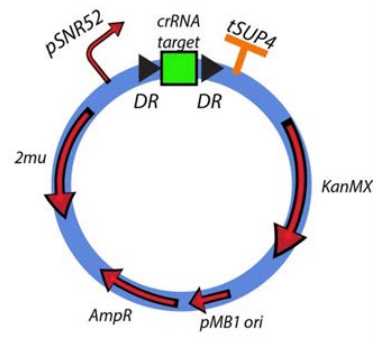

Figure S7b. Schematic representation of crRNA expression plasmid

## Supplementary Table S1

List of primers used in the study

| Primer                                                                     | Primer name                    | Purpose                                                                        | Sequence (5`-3`)                                                                         |
|----------------------------------------------------------------------------|--------------------------------|--------------------------------------------------------------------------------|------------------------------------------------------------------------------------------|
| <b>Construction of <i>FnCpf1</i> expression plasmid</b>                    |                                |                                                                                |                                                                                          |
| 10141                                                                      | 10141_10141_FnCpf1+pTEF1fl.Fw  | Amplification of <i>Fncpf1</i>                                                 | TACAACTTTTTTACTTCTTGCTCATTAGAAAGAAAG<br>CATAGCAATCTAATCTAAGTTTTATGAGCATCTACCA<br>GGAGTT  |
| 10144                                                                      | 10144_10144_Cpf1+pTEF1fl.Rv    | Amplification of <i>Fncpf1</i>                                                 | TCCTTTTCGGTTAGAGCGGATGTGGGGGGAGGGCG<br>TGAATGTAAGCGTGACATAACTAATTTAGGCATAGT<br>CGGGGACAT |
| 10145                                                                      | 10145_10145_pTEF1-CYC1tbackbFw | Amplification of p414- <i>TEF1p</i> -Cas9- <i>CYC1t</i><br>backbone            | GGAAGGTGTGATCTCTTCTC                                                                     |
| 10146                                                                      | 10146_10146_pTEF1-CYC1tbackbRv | Amplification of p414- <i>TEF1p</i> - <i>SpCas9</i> - <i>CYC1t</i><br>backbone | CGAGCCCAATGGAGTACTTC                                                                     |
| 10147                                                                      | 10147_10147_Cpf1+Sga1flFw      | Amplification of endonuclease cassette                                         | TTACAATATAGTGATAATCGTGGACTAGAGCAAGA<br>TTTCAAATAAGTAACAGCAGCAAACATAGCTTCAAA<br>ATGTTTCT  |
| 10189                                                                      | 10189_10189_CC-CYC1t           | Amplification of endonuclease cassette                                         | CATACGAATCTATACGTCGCCTGACGGTTAGAGTGC<br>ATCTCACCATGTGCCGGAAGCTATCAAATTAAGCC<br>TTCGAGCG  |
| 10190                                                                      | 10190_10190_CC-Ura             | Amplification of <i>URA3</i> cassette                                          | ATAGCTTCCGGCACATGGTGAGATGCACTCTAACCG<br>TCAGGCGACGTATAGATTCGTATGAACTGTCATCCT<br>GCGTGAAG |
| 10191                                                                      | 10191_10191_CD-Ura             | Amplification of <i>URA3</i> cassette                                          | AGTGAGACTGTGTGACATCTAGCTACCGAGTCGATC<br>TGATGACTAGCGTCCATCTCGTTGAACTGTCATCCTG<br>CGTGAAG |
| 10192                                                                      | 10192_10192_Ura-Sgal flank     | Amplification of <i>URA3</i> cassette                                          | CTGCAAACGTGGTTGGGCTGGACGTTCCGACATAGT<br>ATCTAATTAATTTATAATATCAGAAGTGTTCACCGT<br>GCCAATG  |
| <b>Construction of <i>FnCpf1</i> expressing plasmid and empty backbone</b> |                                |                                                                                |                                                                                          |



|                                                                                                                 |                                 |                                                                                  |                                                                                                                                    |
|-----------------------------------------------------------------------------------------------------------------|---------------------------------|----------------------------------------------------------------------------------|------------------------------------------------------------------------------------------------------------------------------------|
| 2055                                                                                                            | 2055_AmpRep-f+l                 | Amplification of <i>ampR</i> fragment of pMEL10                                  | TATTCACGTAGACGGATAGGTATAGCCAGACATCAG<br>CAGCATACTTCGGGAACCGTAGGCCGAGAGGCGGTT<br>TGCCTATTGG                                         |
| 4173                                                                                                            | 4173_FK249                      | Amplification of <i>ampR</i> fragment of pMEL10                                  | GTTGAACATTCTTAGGCTGG                                                                                                               |
| 5976                                                                                                            | 5976_pSNR52 fw ol tag l-2       | Amplification of <i>TEF1p –Fncpf1-CYC1t</i>                                      | GCCTACGGTCCCGAAGTATGCTGCTGATGTCTGGC<br>TATACCTATCCGTCTACGTGAATACCCTCACTAAAGG<br>GAACAAAAG                                          |
| 2629                                                                                                            | 2629_Amds rv + B                | Amplification of <i>TEF1p –Fncpf1-CYC1t</i>                                      | GTTGAACATTCTTAGGCTGGTGAATCATTTAGACA<br>CGGGCATCGTCTCTCGAAAGGTGGGCCGCAAATT<br>AAAGCCTTCGAG                                          |
| 12269                                                                                                           | 12269_TAG-B + TAG-I FW          | Closure of pMEL10 empty backbone                                                 | GCCTACGGTCCCGAAGTATGCTGCTGATGT<br>CTGGCTATACCTATCCGTCTACGTGAATAGTT<br>GAACATTCTTAGGCTGGTGAATCATTTAGAC<br>ACGGGCATCGTCTCTCGAAAGGTG  |
| 12270                                                                                                           | 12270_TAGB+TAG-I RV             | Closure of pMEL10 empty backbone                                                 | CACCTTTGAGAGGACGATGCCCGTGTCTAA<br>ATGATTGACCAGCCTAAGAATGTTCAACTAT<br>TCACGTAGACGGATAGGTATAGCCAGACATCA<br>GCAGCATACTTCGGGAACCGTAGGC |
| <b>Diagnostic primers to confirm integration of <i>Fncpf1</i></b>                                               |                                 |                                                                                  |                                                                                                                                    |
| 7298                                                                                                            | 7298_FW_sga1u_check             | Confirmation of correct integration<br>endonuclease                              | TTGTTCAATGGATGCGGTTTC                                                                                                              |
| 10246                                                                                                           | 10246_10246_checkFnCpf1_sgal_Rv | Confirmation of correct integration <i>Fncpf1</i>                                | CTGATGCACACGGAGCTCAG                                                                                                               |
| 10245                                                                                                           | 10245_10245_checkFnCpf1_sgal_Fw | Confirmation of correct integration <i>Fncpf1</i>                                | TGGCTGATGTCAACGGAAAC                                                                                                               |
| 2299                                                                                                            | 2299_UA URA3                    | Confirmation of correct integration <i>URA3</i>                                  | GGCCAATCACAACCACATC                                                                                                                |
| 3180                                                                                                            | 3180_URA3 FW partial            | Confirmation of correct integration <i>URA3</i>                                  | TCATGCAAGTCCGGTTGCATC                                                                                                              |
| 4327                                                                                                            | 4327_URA3 KI FW                 | Confirmation of correct integration <i>URA3</i>                                  | AGTGTTGCACCGTGCCAATG                                                                                                               |
| <b>Diagnostic primers to confirm <i>Fncpf1</i> expressing plasmid assembly and corresponding empty backbone</b> |                                 |                                                                                  |                                                                                                                                    |
| 2376                                                                                                            | 2376_l-reverse                  | Confirmation of correct <i>TEF1p –Fncpf1-CYC1t</i><br>assembly into the backbone | GCCTTTGAGTGAGCTGATACC                                                                                                              |
| 10408                                                                                                           | 10408_10408_FNCPF1_seq1_Rv      | Confirmation of correct <i>TEF1p –Fncpf1-CYC1t</i><br>assembly into the backbone | GCTTCTCATCGTCCAGAATC                                                                                                               |
| 2750                                                                                                            | 2750_Fwd TAG D TEF1prom         | Sanger Sequencing crRNA plasmids                                                 | GCTAAATGTACGGGCGACAG                                                                                                               |
| 2376                                                                                                            | 2376_l-reverse                  | Sanger sequencing of pUDE731 & pUD706                                            | GCCTTTGAGTGAGCTGATACC                                                                                                              |

|                                                                         |                              |                                                       |                                                                                           |
|-------------------------------------------------------------------------|------------------------------|-------------------------------------------------------|-------------------------------------------------------------------------------------------|
| 4661                                                                    | 4661_c URA fw                | Sanger sequencing of pUDE731                          | CATATGATTGTCTCCGTAAGCTC                                                                   |
| <b>Construction of crRNA expression plasmids</b>                        |                              |                                                       |                                                                                           |
| 10224                                                                   | 10224_10224_CA-kanMX-I-Fw    | Amplification of <i>KanMX</i> fragment                | TATCGTGACGCAGTCCCATGGGCCATTACAAACTCA<br>TGCAGACAGTCAGGGAATCCTAGCGACATGGAGGC<br>CCAGAATAC  |
| 10225                                                                   | 10225_10225_CA-kanMX-I-Rv    | Amplification of <i>KanMX</i> fragment                | GCCTACGGTCCCGAAGTATGCTGCTGATGTCTGGC<br>TATACCTATCCGTCTACGTGAATACAGTATAGCGAC<br>CAGCATTC   |
| 10313                                                                   | 10313_10313_A-2um FW         | Amplification of <i>2μm</i> fragment                  | ACTATATGTGAAGGCATGGCTATGGCACGGCAGAC<br>ATTCCGCCAGATCATCAATAGGCACCGCCCTCCACG<br>CATTTAAGC  |
| 10314                                                                   | 10314_10314_2um-CB RV        | Amplification of <i>2μm</i> fragment                  | CGGTCAGATGGGATAACAATCTAGATAAGTTGCGCT<br>GTAGCAGCAAGCTGAATAGCGATGCGTTCACGCCCT<br>CCAACGAAG |
| 2054                                                                    | 2054_Amprep-r+A              | Amplification of <i>ampR</i> fragment                 | GTGCCTATTGATGATCTGGCGGAATGTCTGCCGTGC<br>CATAGCCATGCCTTCACATATAGTTGCGCGGAACCC<br>CTATTTG   |
| 2055                                                                    | 2055_AmpRep-f+l              | Amplification of <i>ampR</i> fragment                 | TATTCACGTAGACGGATAGGTATAGCCAGACATCAG<br>CAGCATACTTCGGGAACCGTAGGCGAGAGGCGGTT<br>TGCGTATTGG |
| 10477                                                                   | 10477_10477_crRNAarray Fw    | Amplification of crRNA array fragment                 | GCATCGCTATTCAGCTTGCTGC                                                                    |
| 10478                                                                   | 10478_10478_crRNAarray RV    | Amplification of crRNA array fragment                 | GCTAGGATTCCTGACTGTC                                                                       |
| 5793                                                                    | pCAS9 rv                     | Amplification of pUD552 backbone                      | GATCATTTATCTTCACTGCGGAG                                                                   |
| 11940                                                                   | 11940_tSUP4_fw               | Amplification of pUD552 backbone                      | GTTTTTTATGTCTTATCGTGACGC                                                                  |
| <b>Diagnostic primers to confirm crRNA expression plasmids assembly</b> |                              |                                                       |                                                                                           |
| 3812                                                                    | 3812_KANMX4 rv               | Diagnostic primer to confirm crRNA arrays integration | TAGATTGTCGCACCTGATTG                                                                      |
| 11966                                                                   | 11966_11966_ADE2 52% gRNA dg | Diagnostic primer for crADE2-3 confirmation           | CCGGTTGTGGTATATTTGGTG                                                                     |
| 11967                                                                   | 11967_11967_HIS4-1 target dg | Diagnostic primer for crHIS4-2 confirmation           | GATTCCAATCAATTCATGGTAAAC                                                                  |
| 11968                                                                   | 11968_11968_HIS4-2 target dg | Diagnostic primer for crHIS4-3 confirmation           | GATTCTAGCCCCACCAAACC                                                                      |

|                         |                              |                                              |                                                                                                                                       |
|-------------------------|------------------------------|----------------------------------------------|---------------------------------------------------------------------------------------------------------------------------------------|
| 11969                   | 11969_11969_HIS4-3 target dg | Diagnostic primer for crHIS4-4 confirmation  | CATCTTGGCTAGCAATGAACAG                                                                                                                |
| 12192                   | 12192_12192_dg CAN1-2 fw     | Diagnostic primer for crCAN1-2 confirmation  | GTTTATCCACACCTCTGACC                                                                                                                  |
| 12193                   | 12193_12193_dg CAN1-3 fw     | Diagnostic primer for crCAN1-3 confirmation  | GGTACTGAACTAGTTGGTATCAC                                                                                                               |
| 12194                   | 12194_12194_dg CAN1-4 fw     | Diagnostic primer for crCAN1-4 confirmation  | CACATATCTTCAACGCTGTTATC                                                                                                               |
| 12195                   | 12195_12195_dg PDR12-2 fw    | Diagnostic primer for crPDR12-2 confirmation | GAGATCGAACCATGACGATG                                                                                                                  |
| 12196                   | 12196_12196_dg PDR12-3 fw    | Diagnostic primer for crPRD12-3 confirmation | CACAAAGAATCAATATGGGTGTC                                                                                                               |
| 12197                   | 12197_12197_dg PDR12-4 fw    | Diagnostic primer for crPDR12-4 confirmation | GTAGATGCATATAAGCATGCTTGG                                                                                                              |
| <b>Repair fragments</b> |                              |                                              |                                                                                                                                       |
| 5614                    | 5614_Oligo CAN 1 fw          | Repair fragment for <i>CAN1</i> deletion     | TATGAGGGTGAGAATGCGAAATGGCGTGGAATGT<br>GATCAAAGGTAATAAAACGTCATATTGCTATGCCTT<br>TTTTTTTTTTTGTTCACAGGAGTTAAGAAGTCTGA<br>AGAACTCTGAAA     |
| 5615                    | 5615_Oligo CAN 1 rv          | Repair fragment for <i>CAN1</i> deletion     | TTTCAGAGTTCCTCAGACTTCTTAACTCCTGTAAAAA<br>CAAAAAAAAAAAAAAGGCATAGCAATATGACGTTTTTA<br>TTACCTTTGATCACATTTCCACGCCATTCGCATTCTC<br>ACCCTCATA |
| 10155                   | 10155_10155_Ade2repairFw     | Repair fragment for <i>ADE2</i> deletion     | ATGGATTCTAGAACAGTTGGTATATTAGGAGGGGG<br>ACAATTGGGACGTATGATTGTTGAGCTTGTCAAAGC<br>ACAAAAGTTAGAACTGTCGGTTACGAAGCTTATCT<br>AGAAAACAAGTAA   |
| 10156                   | 10156_10156_Ade2repairRv     | Repair fragment for <i>ADE2</i> deletion     | TACTTGTTTTCTAGATAAGCTTCGTAACCGACAGTT<br>TCTAACTTTTGTGCTTTGACAAGCTCAACAATCATA<br>GTCCCAATTGTCCCCCTCCTAATATACCAACTGTTCT<br>AGAATCCAT    |
| 10226                   | 10226_10226_His4 repair Fw   | Repair fragment for <i>HIS4</i> deletion     | CGATGTGTGTTGTACATACATAAAAAATATCATAGCA<br>CAACTGCGCTGTGTAATAGTAATACGAACACTAACG<br>AAAATAATATGTATATATACATATATATATCAAACAA<br>AATACAGTCTT |
| 10227                   | 10227_10227_His4 repair Rv   | Repair fragment for <i>HIS4</i> deletion     | AAGACTGTATTTTGTGGATATATATATGTATATATA<br>CATATTATTTTCGTTAGTGTCGTATTACTATTACACA                                                         |

|                                                   |                               |                                                           |                                                                                                                                     |
|---------------------------------------------------|-------------------------------|-----------------------------------------------------------|-------------------------------------------------------------------------------------------------------------------------------------|
|                                                   |                               |                                                           | GCGCAGTTGTGCTATGATATTTTTATGTATGTACAAC<br>ACACATCG                                                                                   |
| 10688                                             | 10688_10688_CAN1 repair FW    | Repair fragment for <i>CAN1</i> deletion                  | ATGACAAATTCAAAAGAAGACGCCGACATAGAGGA<br>GAAGCATATGTACAATGAGCCGGTCGTATGGGAAG<br>ATCATGAACCAAAGACTTTTTGGGACAAATTTTGA<br>ATGTTGTAGCATAG |
| 10689                                             | 10689_10689_CAN1 repair RV    | Repair fragment for <i>CAN1</i> deletion                  | CTATGCTACAACATTCCAAAATTTGTCCAAAAAGTC<br>TTTGTTTCATGATCTTCCCATACGACCGGCTCATTGT<br>ACATATGCTTCTCCTCTATGTCGGCGTCTTCTTTTGA<br>ATTTGTCAT |
| 11612                                             | 11612_11612_ADE2stopcod FW    | Repair fragment for <i>ADE2</i> with premature stop codon | AGTTCGGACTCCGTTCAACTTAAGGCGAAGTTGTT<br>GGCAGAAAATGCAATCAAATCTTAACCCGGTTGTGG<br>TATATTTGGTGTGGAAATGTTCTATTTAGAAACAGG<br>GGAATTGCTTAT |
| 11613                                             | 11613_11613_ADE2stopcod Rv    | Repair fragment for <i>ADE2</i> with premature stop codon | ATAAGCAATTCCTGTTTCTAAATAGAACATTTCCA<br>CACCAAATATACCACAACCGGGTTAAGATTTGATTG<br>CATTTTCTGCCAACAACCTTCGCCTTAAGTTGAACGGA<br>GTCCGGAAC  |
| 7042                                              | 7042_PDR12 Repair Oligo FW    | Repair fragment for <i>PDR12</i> deletion                 | AAAATTGAAAATAAAAATTGTGTGTTAAACCACGAA<br>ATACAAATATATTTGCTTGCTGTTTTTTTATTAATAA<br>GAACAATAACAATAAATCTGTAACCTTTTTTTAAG<br>TGAAAATTA   |
| 7043                                              | 7043_PDR12 Repair Oligo RV    | Repair fragment for <i>PDR12</i> deletion                 | TAATTTTCACTTAAAAAAAAGGTTTACAGATTTATTG<br>TTATTGTTCTTATTAATAAAAAACAAGCAAGCAAAA<br>TATATTTGATTTTCGTGGTTAACACACAATTTTATT<br>TTCAATTTT  |
| <b>Diagnostic primers for target gene editing</b> |                               |                                                           |                                                                                                                                     |
| 2496                                              | 2496_FW-conf-upstrm           | Confirmation <i>CAN1</i> deletion                         | CGGGAGCAAGATTGTTGTG                                                                                                                 |
| 2681                                              | 2681_ADE2dsHRV                | Confirmation <i>ADE2</i> deletion                         | GGACACTTATATGTCGAGCAAGA                                                                                                             |
| 3603                                              | 3603_ade2-AMDS fw3            | Confirmation <i>ADE2</i> deletion                         | TCTAAGTACATCCTACTATAACAATC                                                                                                          |
| 5821                                              |                               | Confirmation <i>CAN1</i> deletion                         |                                                                                                                                     |
| 10228                                             | 10228_10228_His4 del check Fw | Confirmation <i>HIS4</i> deletion                         | AACAGCCGTGGAATCGTTGC                                                                                                                |

|       |                                |                                          |                       |
|-------|--------------------------------|------------------------------------------|-----------------------|
| 10229 | 10229_10229_His4 del check Rv  | Confirmation <i>HIS4</i> deletion        | TGGGTAGTGCCTTGTGATCC  |
| 10803 | 10803_10803_delADE2seqFW       | Amplification of <i>ADE2</i> target site | CGGAAGCTTTGGAAGTACTG  |
| 10804 | 10804_10804_delADE2seqRv       | Amplification of <i>ADE2</i> target site | GAGTCGCCAATGCTCTTTTCG |
| 10805 | 10805_10805_delCAN1seqFW       | Amplification <i>CAN1</i> target site    | AATCCGTTCCAAGAGCCATC  |
| 10806 | 10806_10806_delCAN1seqRv       | Amplification <i>CAN1</i> target site    | GCCGCATAATAAGCCAAGCC  |
| 10791 | 10791_10791_HIS4targetcheckFw  | Amplification <i>HIS4</i> target site    | CGTCCGCAAATTCATGCTG   |
| 10792 | 10792_10792_HIS4targetcheckRv  | Amplification <i>HIS4</i> target site    | CACATCGGCATCTTCATCGG  |
| 10793 | 10793_10793_PDR12targetcheckFw | Amplification crPDR12-1 target site      | ACCACGGCAGGTGCTTATTC  |
| 10794 | 10794_10794_PDR12targetcheckRv | AmplificationcrPDR12-1 target site       | GCGCTACACAACATTTCCC   |
| 254   | 254_PDR12 - CTRL RV            | Confirmation <i>PDR12</i> deletion       | GGAAGATAATAGGCGAGCTC  |
| 3997  | 3997_PDR12 KOfw                | Confirmation <i>PDR12</i> deletion       | CTTTCGGCTATGGCTCATA   |

## Supplementary Table S2.

**Target sequences for Cpf1-mediated *ADE2*, *CAN1*, *HIS4* and *PDR12* editing.** Different target sequences were designed to get a better understanding of the CRISPR-Cpf1 system in *S. cerevisiae*. Relevant characteristics are reported. The RNA secondary structure was predicted with the RNAfold web server, which provides two RNA secondary structures: minimum free energy (left) and centroid (right) prediction. The secondary structure is predicted with the crRNA consisting of the target sequence interspaced by 19 nt DR sequences after maturation by *Fn*Cpf1.

| Plasmid names                                                         | crRNA name | Target sequence (5' to 3') | AT content (%) | Targeting position from ATG (nt) | PAM (5' to 3') | RNA secondary structure                                                               |
|-----------------------------------------------------------------------|------------|----------------------------|----------------|----------------------------------|----------------|---------------------------------------------------------------------------------------|
| <i>ADE2</i> (1716 nt)                                                 |            |                            |                |                                  |                |                                                                                       |
| pUD520                                                                | crADE2-1   | CGGGCACACCGATGACAGGAAGTGG  | 36             | 1438                             | T(TTA)         | 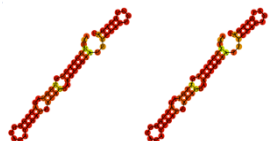  |
| pUD521                                                                | crADE2-2   | CGGCGTACAAAGGACGATCCTTCAG  | 44             | 523                              | T(TTT)         |  |
| pUD438<br>pUD439<br>pUD440<br>pUD552<br>pUDE708<br>pUDE709<br>pUDE710 | crADE2-3   | CCGGTTGTGGTATATTTGGTGTGGA  | 52             | 743                              | T(TTC)         |  |
| pUD522                                                                | crADE2-4   | CATTCAATTGTGCAAATGCCTAGAG  | 60             | 1498                             | T(TTA)         |  |
| pUD523                                                                | crADE2-5   | ATTTGGGATGTTTTACTTGAAGATT  | 72             | 247                              | T(TTA)         |  |
| pUD524                                                                | crADE2-6   | ATTAATGCTCTTTTGAATATATT    | 84             | 317                              | T(TTG)         |  |

|                            |           | CAN1 (1773 nt)            |    |      |        |  |  |
|----------------------------|-----------|---------------------------|----|------|--------|--|--|
| pUD439<br>pUD440<br>pUD550 | crCAN1-1  | TTTGGTCTATCAAAGAACAAGTTGG | 64 | 1204 | T(TTA) |  |  |
| pUDE720                    | crCAN1-2  | ATTGGTTTATCCACACCTCTGACCA | 64 | 322  | T(TTC) |  |  |
| pUDE721                    | crCAN-3   | AAGGTAAGTGAAGTGGTATCAC    | 60 | 893  | T(TTC) |  |  |
| pUDE722                    | crCAN1-4  | CCACATATCTTCAACGCTGTTATCT | 60 | 1123 | T(TTG) |  |  |
|                            |           | HIS4 (2400 nt)            |    |      |        |  |  |
| pUD440                     | crHIS4-1  | CCCAATGTAAGGAGATTGTGTTTGC | 56 | 1514 | G(TTG) |  |  |
| pUDE712<br>pUDE708         | crHIS4-2  | TCCAATCAATTCATGGTAAAACAAA | 72 | 328  | T(TTC) |  |  |
| pUDE713<br>pUDE709         | crHIS4-3  | CTAAAGATTCTAGCCCCACCAAACC | 52 | 730  | T(TTA) |  |  |
| pUDE714<br>pUDE710         | crHIS4-4  | GCATCTGGCTAGCAATGAACAGAG  | 52 | 227  | T(TTA) |  |  |
|                            |           | PDR12 (4536 nt)           |    |      |        |  |  |
| pUD440                     | crPDR12-1 | CATTTATGAAATATGAAGCTGGTGC | 64 | 1847 | A(TTC) |  |  |
| pUDE723                    | crPDR12-2 | GTCGAGATCGAACCATGACGATGAT | 52 | 39   | T(TTC) |  |  |

|         |           |                           |    |      |        |  |
|---------|-----------|---------------------------|----|------|--------|--|
| pUDE724 | crPDR12-3 | GCACAAAGAATCAATATGGGTGTCA | 60 | 2674 | T(TTA) |  |
| pUDE725 | crPDR12-4 | GCATATAAGCATGCTTGGAGAAATT | 62 | 2269 | T(TTC) |  |
